# Supplementary material
Source: PubMed Central journal article supplement (PMC7152510)
Supplement: NIHMS1560646-supplement-Table_S1.pdf [file NIHMS1560646-supplement-Table_S1.pdf]

**Supplementary Table 1. ATPase and microtubule severing activity of structure-guided katanin mutants.**

|           | <b>ATPase (%)</b> | <b>Severing (%)</b> |
|-----------|-------------------|---------------------|
| WT        | 100.00 ± 4.57     | 100.00 ± 5.4        |
| Arg351Ala | 0.51 ± 0.28       | ND                  |
| Arg352Ala | 5.01 ± 0.22       | ND                  |
| Asp322Arg | 4.03 ± 0.33       | ND                  |
| Phe469Ala | 0.68 ± 0.03       | ND                  |

ND, not detectable. Mean ± SEM, N=4.
